# Supplementary material for: Formation of CaUO2(CO3)32−and Ca2UO2(CO3)3(aq) complexes at variable temperatures (10–70 °C)
Source: Royal Society of Chemistry journal article supplement (doi:10.1039/c9dt01174a), 2019-01-01
Supplement: c9dt01174a1.pdf [file c9dt01174a1.pdf]

## Supplementary Information

### Formation of $\text{CaUO}_2(\text{CO}_3)_3^{2-}$ and $\text{Ca}_2\text{UO}_2(\text{CO}_3)_3(\text{aq.})$ Complexes at Variable Temperatures (10 – 70 °C)

*Yongheum Jo<sup>†</sup>, Akira Kirishima<sup>‡</sup>, Shingo Kimuro<sup>‡,§</sup>, Hee-Kyung Kim<sup>||</sup>, Jong-Il Yun<sup>\*,†</sup>*

<sup>†</sup>Department of Nuclear and Quantum Engineering, KAIST, 291 Daehak-ro, Yuseong-gu,  
Daejeon 34141, Republic of Korea

<sup>‡</sup>Institute of Multidisciplinary Research for Advanced Materials, Tohoku University, Sendai,  
Japan

<sup>||</sup>Nuclear Chemistry Research Division, Korea Atomic Energy Research Institute, 111 Daedeok-  
daero 989 beon-gil, Yuseong-gu, Daejeon 34057, Republic of Korea

\*Corresponding Author : Jong-Il Yun (e-mail: jiyun@kaist.ac.kr)

Number of pages: 10

Number of table: 7

Number of figures: 2

**Table S1.** The stoichiometric number of calcium in complexation with  $\text{UO}_2(\text{CO}_3)_3^{4-}$  obtained from the TRLFS slope analysis in triplicate.

| Temperature (°C) | Slope           |                 |
|------------------|-----------------|-----------------|
|                  | $x_1$           | $x_2$           |
| 10               | $0.92 \pm 0.09$ | $2.39 \pm 0.21$ |
| 25               | $0.83 \pm 0.04$ | $2.06 \pm 0.15$ |
| 40               | $0.94 \pm 0.08$ | $2.23 \pm 0.10$ |
| 55               | $0.84 \pm 0.15$ | $2.10 \pm 0.19$ |
| 70               | -               | $2.27 \pm 0.16$ |

**Table S2.** Ion interaction parameter  $\epsilon$  (j,k) (j: ion, k: medium) for SIT correction.

| Ion                                                                  | Background electrolyte medium |                 |                               | Ref.                                |
|----------------------------------------------------------------------|-------------------------------|-----------------|-------------------------------|-------------------------------------|
|                                                                      | Na <sup>+</sup>               | Cl <sup>-</sup> | ClO <sub>4</sub> <sup>-</sup> |                                     |
| Ca <sup>2+</sup>                                                     | -                             | 0.14 ± 0.01     | 0.27 ± 0.03                   | NEA-TDB <sup>1</sup>                |
| UO <sub>2</sub> (CO <sub>3</sub> ) <sub>3</sub> <sup>4-</sup>        | -0.01 ± 0.11                  | -               | -                             | NEA-TDB <sup>1</sup>                |
| CaUO <sub>2</sub> (CO <sub>3</sub> ) <sub>3</sub> <sup>2-</sup>      | -0.1 ± 0.1                    | -               | -                             | PSI/Nagra TDB <sup>2</sup>          |
| Ca <sub>2</sub> UO <sub>2</sub> (CO <sub>3</sub> ) <sub>3</sub> (aq) | -0.06 ± 0.0                   | -               | -                             | NEA-TDB <sup>1</sup> ,<br>This work |

Note that no change in ion interaction parameter in the temperature range of interest (10 – 70 °C) in this work was assumed as discussed in database<sup>1</sup>.

**Table S3.** Debye-Hückel constant A and Debye-Hückel term for SIT at 10, 25, 40, 55, and 70 °C.

| Temperature (°C) | A (kg·mol <sup>-1</sup> ) <sup>1/2</sup> | D     | Ref.                                                |
|------------------|------------------------------------------|-------|-----------------------------------------------------|
| 10               | 0.498                                    | 0.107 | NEA-TDB <sup>1</sup>                                |
| 25               | 0.509                                    | 0.109 | NEA-TDB <sup>1</sup>                                |
| 40               | 0.525                                    | 0.113 | NEA-TDB <sup>1</sup>                                |
| 55               | 0.540                                    | 0.116 | Obtained from interpolation<br>of data <sup>1</sup> |
| 70               | 0.558                                    | 0.120 | Obtained from interpolation<br>of data <sup>1</sup> |

Note that  $Ba_j = 1.5 \text{ kg}^{1/2}\cdot\text{mol}^{-1/2}$  was assumed to be identical in the temperature range of interest (10 – 70 °C) in this work as discussed in database<sup>1</sup>.

**Table S4.** Thermodynamic data of relevant reactions used in TRFS and calorimetry analysis.

| Reactions                                                                                                 | log K°  | $\Delta_r H_m^\circ$ (kJ/mol) | Ref.                                                 |
|-----------------------------------------------------------------------------------------------------------|---------|-------------------------------|------------------------------------------------------|
| $\text{H}_2\text{O}(\text{l}) \rightleftharpoons \text{H}^+ + \text{OH}^-$                                | -13.997 | 55.81                         | NIST 46.7                                            |
| $\text{H}^+ + \text{CO}_3^{2-} \rightleftharpoons \text{HCO}_3^-$                                         | 10.33   | -14.7                         | [PAT/MES84] <sup>3</sup>                             |
| $2\text{H}^+ + \text{CO}_3^{2-} \rightleftharpoons \text{CO}_2(\text{aq}) + \text{H}_2\text{O}(\text{l})$ | 16.68   | -23.8                         | [PAT/MES84] <sup>3</sup><br>[PAT/MES82] <sup>4</sup> |
| $\text{Ca}^{2+} + \text{CO}_3^{2-} \rightleftharpoons \text{CaCO}_3(\text{aq})$                           | 3.22    | 15                            | [PLU/BUS82] <sup>5</sup> ,<br>SUPCRT <sup>6</sup> ,  |
| $\text{Ca}^{2+} + \text{H}^+ + \text{CO}_3^{2-} \rightleftharpoons \text{CaHCO}_3^+$                      | 1.11    | -3.66                         | [PLU/BUS82] <sup>5</sup> ,<br>SUPCRT <sup>6</sup> ,  |
| $\text{Ca}^{2+} + \text{OH}^- \rightleftharpoons \text{CaOH}^+$                                           | -12.70  | Not used                      | NIST 46.7                                            |
| $\text{UO}_2^{2+} + 2\text{CO}_3^{2-} \rightleftharpoons \text{UO}_2(\text{CO}_3)_2^{2-}$                 | 16.61   | 18.5                          | NEA-TDB <sup>1</sup>                                 |
| $\text{UO}_2^{2+} + 3\text{CO}_3^{2-} \rightleftharpoons \text{UO}_2(\text{CO}_3)_3^{4-}$                 | 21.84   | -39.2                         | NEA-TDB <sup>1</sup>                                 |

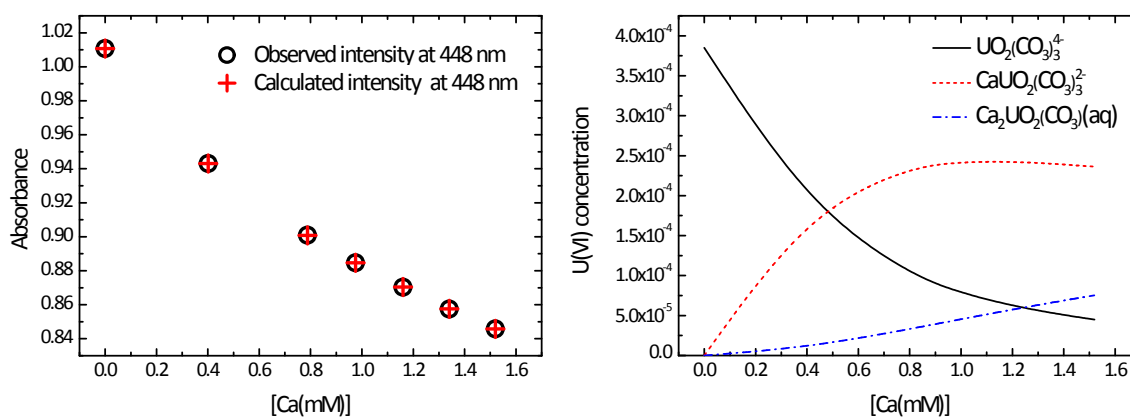**Figure S1.** Representative UV/Vis spectrophotometry obtained from experiment with LWCC. Comparison of observed and calculated intensities at 448 nm (left) and U(VI) speciation during titration (right).

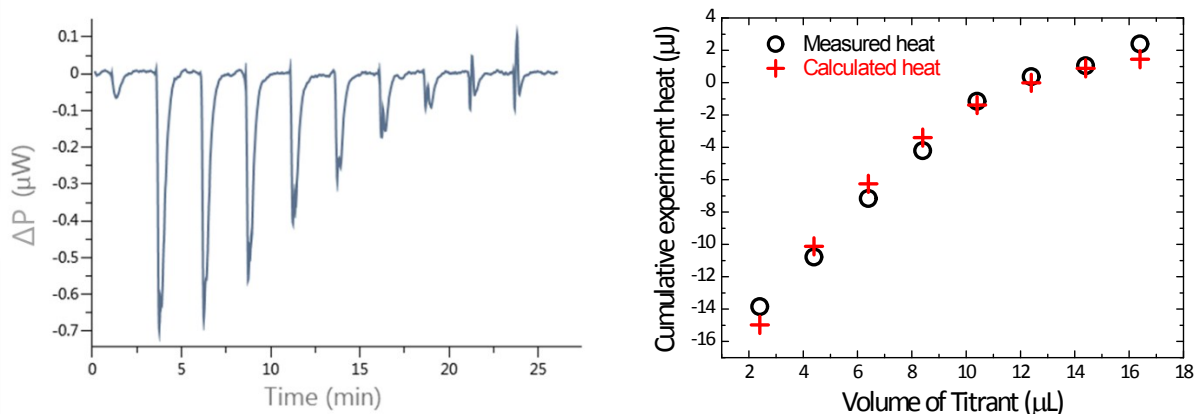

**Figure S2.** Representative calorimetric titration at 25 °C (PEAQ-ITC). Thermogram of a calorimetric titration (left) and measured and calculated cumulative heats (right).

**Table S5.** Comparison of reaction enthalpies measured by TAM-III (TA instrument) and PEAQ-ITC (Malvern)

| Reactions                                                                                                                | $\Delta_r H^\circ_m$ (kJ/mol) |                |
|--------------------------------------------------------------------------------------------------------------------------|-------------------------------|----------------|
|                                                                                                                          | TAM-III                       | PEAQ-ITC       |
| $\text{Ca}^{2+} + \text{UO}_2(\text{CO}_3)_3^{4-} \rightleftharpoons \text{CaUO}_2(\text{CO}_3)_3^{2-}$                  | $-1.2 \pm 0.3$                | $-1.2 \pm 0.3$ |
| $\text{Ca}^{2+} + \text{CaUO}_2(\text{CO}_3)_3^{2-} \rightleftharpoons \text{Ca}_2\text{UO}_2(\text{CO}_3)_3(\text{aq})$ | $-3.5 \pm 1.4$                | $-0.2 \pm 1.3$ |

### Calculation of reaction enthalpy

In this work, reaction enthalpy was calculated by the error minimization between the measured heat and the calculated heat. The method of least square was used for the error minimization. The measured heat in  $i$ th addition ( $Q_{\text{ex},i}$ ) from the main titration was corrected by the dilution heat in  $i$ th addition ( $Q_{\text{dil},i}$ ) from a separated titration run to obtain the net heat from reactions of interest ( $Q_{\text{net},i} = Q_{\text{ex},i} - Q_{\text{dil},i}$ ). The calculated heat in  $i$ th addition ( $Q_{\text{cal},i}$ ) was obtained by the formation constants corrected by SIT and enthalpies of relevant chemical reaction (Table S5) as shown in eq S1:

$$Q_i(\text{cal.})$$

$$= \Delta H_{013}(v_i^{013} - v_{i-1}^{013}) + \Delta H_{113}(v_i^{113} - v_{i-1}^{113}) + \Delta H_{213}(v_i^{213} - v_{i-1}^{213})$$

(S1)

### Modification to isoelectric reaction

For the constant reaction enthalpy approximation, the original reactions of (i) and (ii) were modified to the isoelectric reactions, in which the total amount of positive charges among the reactants is equal to that among the products and the same condition is applied to the negative charge. In case of the isoelectric reaction, the electrostatic contribution to the temperature can be canceled out and the change in heat capacity of reaction can be assumed to be negligible<sup>1</sup>. For the modification, the subtraction or/and addition of relevant reaction equations are required as follows:

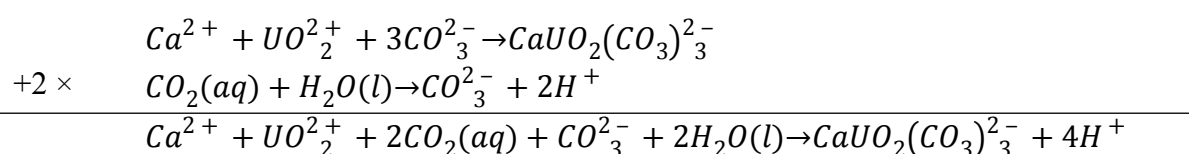

Likewise,

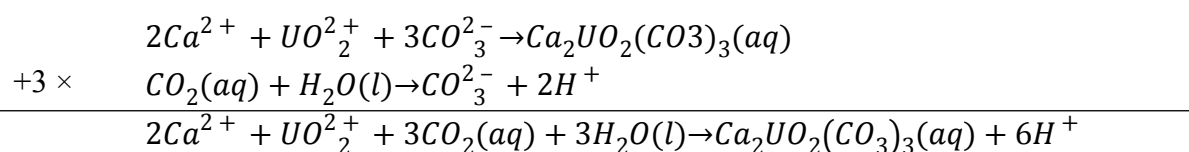

Thermodynamic data for the modification are presented in Table S6.

**Table S6.** Thermodynamic data of relevant reactions used in the modification to isoelectric reaction.

| Reactions                                                               | log K° | $\Delta_r H_m^\circ$<br>(kJ/mol) | Ref.                                                 |
|-------------------------------------------------------------------------|--------|----------------------------------|------------------------------------------------------|
| $H^+ + CO_3^{2-} \rightleftharpoons HCO_3^-$                            | 10.33  | -14.7                            | [PAT/MES84] <sup>3</sup>                             |
| $2H^+ + CO_3^{2-} \rightleftharpoons CO_2(aq) + H_2O(l)$                | 16.68  | -23.8                            | [PAT/MES84] <sup>3</sup><br>[PAT/MES82] <sup>4</sup> |
| $UO_2^{2+} + 3CO_3^{2-} \rightleftharpoons UO_2(CO_3)_3^{4-}$           | 21.84  | -39.2                            | NEA-TDB <sup>1</sup>                                 |
| $Ca^{2+} + UO_2(CO_3)_3^{4-} \rightleftharpoons CaUO_2(CO_3)_3^{2-}$    | 5.18   | -1.2                             | This work                                            |
| $Ca^{2+} + CaUO_2(CO_3)_3^{2-} \rightleftharpoons Ca_2UO_2(CO_3)_3(aq)$ | 3.52   | -0.5                             | This work                                            |





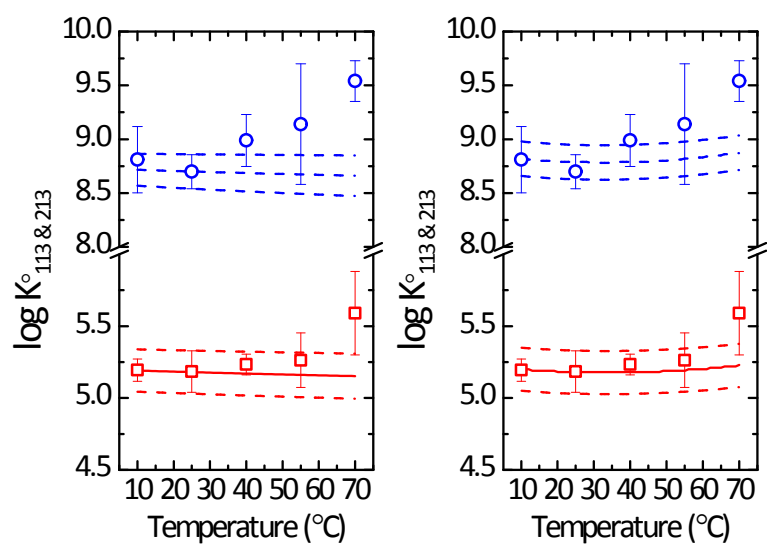

**Figure S3.** Van't Hoff equation (left) and DQUANT<sup>7</sup> (right) approximations.

## Uranium(VI) speciation at 70 °C

The U(VI) speciation was carried out using PHREEQC<sup>8</sup>. The formation constants ( $\log K^\circ$ ) and the molar reaction enthalpies ( $\Delta_r H^\circ_m$ ) for U(VI) hydrolysis and  $\text{UO}_2(\text{CO}_3)_x^{2-2x}$  ( $x = 1, 2$ , and  $3$ ) at 25 °C were obtained from NEATDB<sup>1</sup>.  $\log K^\circ$  and  $\Delta_r H^\circ_m$  of  $\text{CaUO}_2(\text{CO}_3)_3^{2-}$  and  $\text{Ca}_2\text{UO}_2(\text{CO}_3)_3(\text{aq})$  at 25 °C determined in this work were used.  $\log K^\circ$  and  $\Delta_r H^\circ_m$  of other relevant reactions were obtained at 25 °C from the database 'sit.dat' of PHREEQC<sup>8</sup>.

Hydrolysis constants were corrected to the values at 70 °C based on the van't Hoff equation. Approximation of the van't Hoff equation for U(VI) hydrolysis showed an excellent agreement in previous work<sup>9</sup>.  $\log K^\circ$  of  $\text{UO}_2(\text{CO}_3)_x^{2-2x}$  ( $x = 1, 2$  and  $3$ ) and  $\text{Ca}_y\text{UO}_2(\text{CO}_3)_3^{2-2y}$  ( $y = 1$  and  $2$ ) were corrected to the values at 70 °C based on the constant reaction enthalpy approximation via the modification to isoelectric reactions (as described above) and introduced to database in expressions as follows:

$$\log K(T) = \frac{p_1}{T} + p_2 \cdot \log(T) + p_3 \cdot T + \frac{p_4}{T^2} + p_5$$

**Table S7.** Expressions for  $\log K^\circ(T)$  based on the constant enthalpy approximation

|       | $\text{Ca}^{2+} + \text{UO}_2(\text{CO}_3)_3^{4-} \rightleftharpoons \text{CaUO}_2(\text{CO}_3)_3^{2-}$ | $2\text{Ca}^{2+} + \text{UO}_2(\text{CO}_3)_3^{4-} \rightleftharpoons \text{Ca}_2\text{UO}_2(\text{CO}_3)_3(\text{aq})$ |
|-------|---------------------------------------------------------------------------------------------------------|-------------------------------------------------------------------------------------------------------------------------|
| $p_1$ | - 27723                                                                                                 | - 55483                                                                                                                 |
| $p_2$ | - 157.79                                                                                                | - 315.59                                                                                                                |
| $p_3$ | 0.08394                                                                                                 | 0.16788                                                                                                                 |
| $p_4$ | $2.2087 \times 10^6$                                                                                    | $4.4174 \times 10^6$                                                                                                    |
| $p_5$ | $4.3874 \times 10^2$                                                                                    | $8.7593 \times 10^2$                                                                                                    |

$\log K^\circ$  of other relevant reactions were corrected to the values at 70 °C based on the van't Hoff equation.

## References

1. R. Guillaumont, T. Fanghänel, J. Fuger, I. Grenthe, V. Neck, D. A. Palmer and M. H. Rand, *Chemical Thermodynamics vol. 5, Update on the Chemical Thermodynamics of Uranium, Neptunium, Plutonium, Americium and Technetium*, Elsevier, Amsterdam, 2003.
2. T. Thoenen, W. Hummel, U. Berner and E. Curti, *The PSI/Nagra Chemical Thermodynamic Database 12/07*, Paul Scherrer Institut, Villigen PSI, Switzerland, 2014.
3. C. S. Patterson, R. H. Busey and R. E. Mesmer, *Journal of Solution Chemistry*, 1984, **13**, 647-661.
4. C. S. Patterson, G. H. Slocum, R. H. Busey and R. E. Mesmer, *Geochimica et Cosmochimica Acta*, 1982, **46**, 1653-1663.
5. L. N. Plummer and E. Busenberg, *Geochimica et Cosmochimica Acta*, 1982, **46**, 1011-1040.
6. J. W. Johnson, E. H. Oelkers and H. C. Helgeson, *Computers & Geosciences*, 1992, **18**, 899-947.
7. H. C. Helgeson, *The Journal of Physical Chemistry*, 1967, **71**, 3121-3136.
8. D. L. Parkhurst and C. A. J. Appelo, *Description of input and examples for PHREEQC version 3: a computer program for speciation, batch-reaction, one-dimensional transport, and inverse geochemical calculations*, Report 2328-7055, US Geological Survey, Denver, Colorado, 2013.
9. P. Zanonato, P. Di Bernardo, A. Bismondo, G. Liu, X. Chen and L. Rao, *Journal of the American Chemical Society*, 2004, **126**, 5515-5522.
